1 **A critical role of the T3SS effector EseJ in intracellular trafficking and**  
2 **replication of *Edwardsiella piscicida* in non-phagocytic cells**

3 Lingzhi Zhang<sup>a</sup>, Jiatiao Jiang<sup>a</sup>, Tianjian Hu<sup>a</sup>, Jin Zhang<sup>a</sup>, Xiaohong Liu<sup>a,b</sup>, Dahai  
4 Yang<sup>a,b</sup>, Yuanxing Zhang<sup>a,b,c</sup>, Qin Liu<sup>a,b,c\*</sup>

5 <sup>a</sup> State Key Laboratory of Bioreactor Engineering, East China University of Science  
6 and Technology, Shanghai, 200237, China

7 <sup>b</sup> Shanghai Engineering Research Center of Maricultured Animal Vaccines, Shanghai  
8 200237, China

9 <sup>c</sup> Shanghai Collaborative Innovation Center for Bio-manufacturing Technology,  
10 Shanghai 200237, China

11 Address correspondence to Qin Liu, [qinliu@ecust.edu.cn](mailto:qinliu@ecust.edu.cn) (Q. Liu)

12 \* Present address: State Key Laboratory of Bioreactor Engineering, East China  
13 University of Science and Technology, 130 Meilong Road, Shanghai 200237, China.

14  
15  
16  
17

## 18 Abstract

19 *Edwardsiella piscicida* (*E. piscicida*) is an intracellular pathogen within a broad  
20 spectrum of hosts. Essential to *E. piscicida* virulence is its ability to survive and  
21 replicate inside host cells, yet the underlying mechanisms and the nature of the  
22 replicative compartment remain unclear. Here, we characterized its intracellular  
23 lifestyle in non-phagocytic cells and showed that intracellular replication of *E. piscicida*  
24 in non-phagocytic cells is dependent on its type III secretion system. Following  
25 internalization, *E. piscicida* is contained in vacuoles that transiently mature into early  
26 endosomes, but subsequently bypasses the classical endosome pathway and fusion with  
27 lysosomes which depends on its T3SS. Following a rapid escape from the degradative  
28 pathway, *E. piscicida* was found to create a specialized replication-permissive niche  
29 characterized by endoplasmic reticulum (ER) markers. We also found that a T3SS  
30 effector EseJ is responsible for intracellular replication of *E. piscicida* by preventing  
31 endosome/lysosome fusion. Furthermore, *in vivo* experiments confirmed that EseJ is  
32 necessary for bacterial colonization of *E. piscicida* in both mice and zebrafish. Thus,  
33 this work elucidates the strategies used by *E. piscicida* to survive and proliferate within  
34 host non-phagocytic cells.

35 **Keywords:** *Edwardsiella piscicida* T3SS effector intracellular trafficking

## 36 Author summary

37 *E. piscicida* is a facultative intracellular bacterium associated with septicemia and  
38 fatal infections in many animals, including fish and humans. However, little is known  
39 about its intracellular life, which is important for successful invasion of the host. The  
40 present study is the first comprehensive characterization of *E. piscicida*'s intracellular  
41 life-style in host cells. Upon internalization, *E. piscicida* is transiently contained in  
42 Rab5-positive vacuoles, but the pathogen prevents further endosome maturation and  
43 fusion with lysosomes by utilizing an T3SS effector EseJ. In addition, the bacterium  
44 creates an specialized replication niche for rapid growth via an interaction with the ER.  
45 Our study provides new insights into the strategies used by *E. piscicida* to successfully  
46 establishes an intracellular lifestyle that contributes to its survival and dissemination  
47 during infection.

48

## 49 **Introduction**

50 Intracellular pathogens often invade host cells as a means of escaping extracellular  
51 immune defenses and creating a safe niche for replication. However, internalized  
52 pathogens are not entirely protected, as they are normally routed to lysosomes for  
53 degradation. Invasive pathogens must devise strategies to avoid this. Typically,  
54 intracellular pathogens either (i) reside within a customized, membrane-bound  
55 compartment, which limits trafficking along the endosomal pathway, as observed for  
56 *Legionella* [1], *Brucella subspp* [2] and *Salmonella* [3], or (ii) rupture and escape their  
57 vacuole to reside and replicate in the host cytosol, as in the case for *Shigella*, *Listeria*,  
58 and *Rickettsia subspp* [4].

59 Many pathogenic bacteria are found to proliferate in a membrane-bound  
60 compartment. These bacteria adopt different strategies to survive after phagocytosis.  
61 Some bacteria, such as *Salmonella* [5] and *Coxiella burnetii* [6], survive and  
62 proliferate in an acidic compartment. Other pathogens avoid lysosomal fusion by  
63 blocking phagosome maturation, such as *Mycobacterium tuberculosis* [7], or by  
64 hijacking the eukaryotic secretory pathway, such as *Legionella pneumophila* [1]. *E.*  
65 *piscicida* was reported to reside within membrane-bound vacuoles (ECVs) after  
66 infection of both phagocytic and non-phagocytic cells [8,9]. However, the mechanism  
67 by which the bacterium evade lysosomal degradation remains unclear.

68 Host cell manipulation by pathogenic bacteria is largely mediated through the  
69 delivery of an arsenal of virulence proteins called effectors to the host cell cytosol  
70 [10,11]. *Legionella pneumophila* produce multiple effector proteins which specifically

71 target host proteins such as Arf1, Rab1 and Sec22b to ultimately create a replicative  
72 organelle [12]. *Salmonella typhi* serovar Typhimurium is known to regulate  
73 *Salmonella*-containing vacuole (SCV) trafficking via the action of SPI-2 T3SS-  
74 delivered effectors [3]. For example, SifA targets the host GTPase Rab9 to inhibit the  
75 process of Rab9-dependent M6PR recycling [13] and SopD2 targets the host GTPase  
76 Rab7 to perturb endocytic trafficking [14]. Previous studies have shown that T3SS and  
77 T6SS mechanisms are essential for the virulence of *E. piscicida* [15]. An increasing  
78 number of T3SS and T6SS effectors have been identified, including EseG [16], EseJ  
79 [17], EseH [18], EseK [19] and EvpP [20]. EseG was reported to localize to the ECV  
80 membrane, but its function remains undefined [21]. EseJ was reported to be involved  
81 in the adhesion stage during infection [17]. However, the virulence factors involved in  
82 the regulation of replication of *E. piscicida* in host cells remain unknown.

83       Given previous findings supporting the ability of *E. piscicida* to invade, survive,  
84 and replicate within non-phagocytic cells [8], the goal of the present work was to  
85 uncover the strategies and molecular mechanisms used by this pathogen to circumvent  
86 lysosomal routing and establish a replicative niche within the host. We have identified  
87 an effector EseJ that is required for intracellular replication in a specialized vacuole that  
88 is important for *E. piscicida* replication inside host cells. We found that EseJ acts by  
89 inhibiting lysosome degradation of the pathogen which we find is important for  
90 systemic infection in vivo. Through these strategies, *E. piscicida* successfully  
91 establishes an intracellular lifestyle that could contribute to its survival and  
92 dissemination during infection.

## 93 **Results**

### 94 **Intracellular replication of *E. piscicida* in non-phagocytic cells depends on its T3SS** 95 **but not T6SS.**

96 *E. piscicida* prefers an intracellular lifestyle upon infection in either epithelial [8] or  
97 phagocytic cells [23]. However, the virulence factors involved in such an intracellular  
98 process remain undefined. Considering that T3SS and T6SS are the most important  
99 virulence factors for *E. piscicida*, we first monitored the survival and replication of both  
100 the wild-type EIB202 and the isogenic T3SS or T6SS mutant strains in three different  
101 non-phagocytic cells, HeLa, Caco-2 and ZF4. Both EIB202 and  $\Delta$ T6SS infection of  
102 nonphagocytic cells, followed by gentamicin-induced death of extracellular bacteria,  
103 revealed a progressive increase in intracellular bacterial numbers over time (Fig 1A).  
104 In contrast, no replication was observed in the  $\Delta$ T3SS mutant, indicating that a  
105 functional T3SS, but not a T6SS, is required for intracellular survival of *E. piscicida* in  
106 non-phagocytic cells. In order to visualize bacterial invasion and intracellular  
107 replication, HeLa cells were infected with green fluorescent protein (GFP)-tagged *E.*  
108 *piscicida* strains, confocal microscopy images were acquired and the number of  
109 intracellular bacteria in EIB202-infected cells were scored over time. About 15% of  
110 HeLa cells containing hyper-replicating bacteria were observed after EIB202 and  
111  $\Delta$ T6SS infection for 8 h, but not with the  $\Delta$ T3SS mutant strain (Fig 1B and 1C).  
112 Collectively, these results suggest that *E. piscicida* can survive and replicate in non-  
113 phagocytic cells via a mechanism mediated by the T3SS, but not T6SS.

### 114 ***E. piscicida* prevents endosome maturation and lysosome fusion**

115 Once inside host cells, invasive bacteria either replicate within the endosome or escape  
116 the vacuole and replicate in the cytoplasm. Consistent with our previous study [21], *E.*  
117 *piscicida* located within vacuolar compartment (s) after infection which we named the  
118 *E. piscicida*-contained vacuoles (ECVs) (S1A Fig). Galectin-3 is a  $\beta$ -galactoside  
119 binding protein that is specifically recruited to disrupted pathogen-containing vacuoles  
120 [24]. To further investigate if *E. piscicida* remains inside the vacuoles during its whole  
121 intracellular lifecycle, the presence of galectin-3 around the ECV was assessed using  
122 fluorescence microscopy. Less than 10% of vacuoles harboring WT *E. piscicida* co-  
123 localized with galectin-3 in HeLa cells over time (S1B Fig). These data suggest that *E.*  
124 *piscicida* EIB202 resides and replicates inside pathogen-containing vacuoles  
125 throughout the course of infection.

126 Next, we wished to understand the strategies used by this pathogen to establish and  
127 maintain its intracellular life cycle. Following internalization, foreign particles and  
128 many bacteria are usually found within membrane-bound compartments that  
129 sequentially develop into early and late endosomes for ultimate fusion with lysosomes,  
130 where the particles are degraded. We monitored the acquisition of endosomal markers  
131 and lysosomal fusion in *E. piscicida*-containing vesicles over time using confocal  
132 microscopy. Early after invasion (1 h after infection), over 70% of both intracellular  
133 wild-type and  $\Delta$ T3SS mutant were found enclosed within vacuoles that co-localized  
134 with the early endosomal protein Rab5 (Fig 2A and 2B), indicating interactions with  
135 early endosomes. These interactions were transient, as Rab5 colocalization rapidly  
136 decreased to 5% and 3% by 4 h post-gentamicin incubation after infection with both

137 wild-type EIB202 and the  $\Delta$ T3SS mutant strains (Fig 2A and B). As Rab5  
138 colocalization was progressively lost, an increasing number of  $\Delta$ T3SS mutant bacteria  
139 colocalized with the late endosomal markers Rab7 and lysosome-associated membrane  
140 protein 1 (Lamp-1) over time, which is consistent with vacuolar maturation (Fig 2B-E).  
141 In contrast, the majority of the vacuoles containing wild-type EIB202 were negative for  
142 both Rab7 and Lamp1 (Fig 2B-E). These results suggest wild-type *E. piscicida*  
143 transiently interacts with early endosomes, but avoids endosome maturation during  
144 infection.

145       Considering that luminal acidification is another critical characteristic of endosome  
146 maturation, we used the fixable acid tropic probe LysoTracker to monitor acidic  
147 organelles in infected cells. A major overlap was found between the dye and  $\Delta$ T3SS  
148 mutant strain, but not wild-type EIB202 as early as 2 h (Fig 3A and B). Thus, these  
149 results suggest the ECVs formed by the wild-type bacterium avoid vacuolar  
150 acidification and maturation by perturbing the fusion with lysosomes. To further  
151 understand this process, we assessed ECV co-localization with TR-dextran. Prior to  
152 bacterial infection, cells were pulsed with TR-dextran for 6 h followed by overnight  
153 chase in dye-free medium to ensure that the probe is delivered from early and recycling  
154 endosomes to lysosomes [25]. Confocal immunofluorescence and quantification data  
155 showed that the majority of wild-type EIB202-containing vacuoles did not co-localize  
156 with TR-dextran (Fig 3C and D). In contrast, when cells were infected with the  $\Delta$ T3SS  
157 strain, more than 70% of the ECVs did co-localize with TR-dextran at 8 h post-  
158 infection (Fig 3C and D). Taken together, these results indicate that *E. piscicida* utilize



159 its T3SS to successfully evade lysosomal fusion and ultimately replicate in nonacidic  
160 compartments lacking lysosomal or late endosomal characteristics.

### 161 **ECVs acquire ER markers during maturation into a replicative organelle**

162 Our results indicate that wild-type *E. piscicida* circumvented the classical endocytic  
163 pathway to establish a specialized replication-permissive niche. This raises the  
164 possibility that the bacterium may interact with other intracellular compartments. The  
165 endoplasmic reticulum (ER) was reported to be recruited and hijacked by many  
166 intracellular pathogens to create their replication niche [1,26]. We first used a specific  
167 ER-tracker dye to assess the intracellular ER structures and analyzed the presence of  
168 ER marker in bacterium-containing vacuoles. Surprisingly, ER-tracker labeling was  
169 present in the EIB202 replication compartment located at the perinuclear regions of  
170 HeLa cells, but this was excluded in  $\Delta$ T3SS-containing vacuoles (Fig 4A and B). The  
171 same result was observed when we studied the distribution of the ER membrane-bound  
172 lectin calnexin in EIB202 or  $\Delta$ T3SS-infected cells (Fig 4C and D). Together, these data  
173 suggest that *E. piscicida* replicates inside ER-enriched vacuoles.

### 174 **A T3SS effector EseJ is responsible for *E. piscicida*'s intracellular replication**

175 The finding that the T3SS plays a critical role in the inhibition of endosome maturation  
176 and *E. piscicida* lysosome degradation raised the question of what T3SS effectors are  
177 involved in this process. To date, several *E. piscicida* T3SS effectors including EseG  
178 [16], EseJ [17], EseH [18] and EseK [19] have been identified. To assess the role of  
179 individual effectors, we tested the ability of WT and isogenic *E. piscicida* effector  
180 mutants to replicate inside non-phagocytic host cells. We found that only the *eseJ*

181 mutant showed a marked deficiency in intracellular replication compared to wild-type  
182 bacteria as assessed by CFU intracellular counts (Fig. 5A). To determine whether the  
183 impaired ability of the *eseJ* mutant to replicate intracellularly was attributed to effects  
184 on lysosome fusion and degradation, we investigated the characteristics of the  $\Delta$ *eseJ*-  
185 containing compartments over time. Coincident with the intracellular fate of  $\Delta$ T3SS,  
186  $\Delta$ *eseJ*-containing vacuoles progressively co-localized with Rab7 (S2A Fig) and Lamp-  
187 1(Fig 5B and S2B Fig). Moreover, the mature Lamp-1-positive  $\Delta$ *eseJ*-containing  
188 vacuoles were found to be fused with lysosomes as assessed using the acidification  
189 probe LysoTracker Red DND-99 and pre-loaded Dextran (Fig 5C and 5D). These  
190 findings suggest that the effector EseJ is critical for *E. piscicida*'s replication inside  
191 cells by disrupting vacuolar trafficking to the lysosome during infection.

192 To further assess the function of EseJ, we analyzed the effect of EseJ expression  
193 on the transport and the degradation of exogenously added DQ-Red bovine serum  
194 albumin (BSA), which emits red fluorescence upon proteolytic degradation and is used  
195 as a sensitive indicator of lysosomal activity [14]. Bright punctate signal intensity of  
196 DQ-Red BSA were significantly attenuated in cells stably expressing EseJ compared  
197 with that observed in cells expressing vector alone (Fig 6A and 6B), indicating that  
198 EseJ expression suppresses lysosome function. Consistently, cells infected with wild-  
199 type, but not  $\Delta$ T3SS or  $\Delta$ *eseJ* *E. piscicida* mutants displayed a remarkable decrease in  
200 DQ-Red BSA fluorescence intensity (S2C Fig). Next, we investigated the delivery of  
201 endosomal cargo to lysosomes by pre-loading cells with dextran 488 prior to  
202 transfection and then treated the cells with rhodamine dextran. In line with the results

203 shown above, the dextran derivatives co-localized with a Mander's coefficient of more  
204 than 0.5 in control cells, suggesting significant endosome-lysosome fusion, whereas  
205 EseJ-HA expression resulted in significantly less co-localization (Fig 6 C and 6D).  
206 Collectively, these results demonstrate that T3SS effector EseJ is both necessary and  
207 sufficient to block endocytic trafficking to lysosomes and consequently critical for *E.*  
208 *piscicida*'s intracellular replication.

### 209 **Role of EseJ in *E. piscicida*'s infection in vivo**

210 *E. piscicida* T3SS was reported to act as a critical virulence factor in disease  
211 pathogenesis in both mouse and fish infection models [23, 27]. To assess the role of the  
212 T3SS effector EseJ in animal infection, C57BL/6 wild-type mice were orally infected  
213 with wild-type and isogenic  $\Delta$ *eseJ* *E. piscicida* strains. Compared to wild-type EIB202,  
214 the  $\Delta$ *eseJ* strain showed reduced bacterial burdens in the cecum and intestinal lumen as  
215 well as systemic sites including the liver, spleen and kidneys (Fig 7A). Likewise,  
216 reduced colonization of the  $\Delta$ *eseJ* mutant was observed in zebrafish larvae after  
217 infection when compared to the wild-type bacterium (Fig 7B). Notably, zebrafish  
218 infected with wild-type *E. piscicida* showed marked mortality, with ~75% of the  
219 animals succumbing by day 3–4 post-infection whereas only ~50% of fish succumbed  
220 to infection with the *eseJ* mutant (Fig. 7C). Collectively, these data suggest that the  
221 effector EseJ contributes to *E. piscicida* colonization and virulence in vivo.

222

## 223 **Discussion**

224 *E. piscicida* was recently shown to invade and proliferate within many non-phagocytic  
225 cells [8], but the mechanism by which the bacterium its own survival inside host cells  
226 remained unclear. Here we report a comprehensive description of how *E. piscicida*  
227 turns the intracellular environment into a hospitable niche that allows for efficient  
228 bacterial replication. Subversion of the phagocytic pathway by intracellular bacteria is  
229 a general mechanism to establish an appropriate replication niche. Pathogens are known  
230 to adopt diverse strategies to disrupt the maturation process at different stages and to  
231 prevent its delivery into a phagolysosome. For example, *Mycobacterium* remains  
232 within an early endosomal compartment [7] that excludes the vacuolar ATPase, thus  
233 inhibiting the acidification of the bacterial phagosome. The maturation of the SCV is  
234 arrested at a late endosome-like stage, selectively excluding proteins such as mannose  
235 6-phosphate receptors (MPR) and lysosomal cathepsin proteins [13]. In the present  
236 study, we tracked the acquisition of endosomal markers and lysosomal fusion in *E.*  
237 *piscicida*-containing vesicles over time using confocal microscopy and demonstrated  
238 that *E. piscicida* bypassed the classical endosome pathway after transiently interactions  
239 with early endosomes. Our studies indicate that using this strategy, *E. piscicida* disrupts  
240 endosomal maturation and evades lysosome degradation.

241 Our study characterized an important contribution of the T3SS effector EseJ in  
242 regulating endocytic trafficking of *E. piscicida* within host cells. Intracellular  
243 expression of EseJ was found necessary and sufficient to block endocytic progression  
244 to lysosomes (Fig 5 and Fig 6). Notably, the *eseJ* mutant was greatly impaired in

245 intracellular replication when compared to the wild-type bacterium, indicating that EseJ  
246 is an important factor for intracellular survival and replication of *E. piscicida*. However,  
247 it remains unclear how EseJ evades fusion with lysosomes to evade degradation. One  
248 possibility is that EseJ interacts with host small guanine nucleotide binding proteins  
249 (GTPases), phospholipids or other host proteins that are enriched and central for  
250 endocytic trafficking. The strategy of interacting with endosome-bounded proteins is  
251 an efficient tactic used by other pathogens to combat the host's bactericidal defenses.  
252 For example, *Mycobacterium tuberculosis* (Mtb) secretes SapM, a phosphatase that  
253 removes PI(3)P from Mtb-containing vacuoles by converting it to PI, thereby arresting  
254 endosomal maturation [28]. *Legionella pneumophila* secreted VipD to interact with  
255 early endosomal protein Rab5 to protect from endosomal fusion [29]. Another question  
256 is whether EseJ act in concert with other virulence factors involved in the regulation of  
257 ECV trafficking which needs to be investigated in future studies.

258       Orchestration with other intracellular compartments and routing into a specialized  
259 compartment favorable for replication is another important mechanism for the survival  
260 of bacterial pathogens inside host cells. For example, biogenesis of *Legionella*-  
261 replicative compartments depends upon a rapid interception of COPI-dependent  
262 vesicular trafficking from endoplasmic ER exit sites [12]. Formation of SCVs is  
263 associated with the Golgi apparatus and induces endosomal tubulations that extend  
264 towards the cell periphery [30]. Interestingly, we observed obvious ER characteristic  
265 associated with ECVs. However, how *E. piscicida* recruits and interacts with ER  
266 remains to be elucidated.

267 Overall, our studies demonstrate a complex and deliberate intracellular life cycle  
268 of *E. piscicida* in non-phagocytic cells (see model in Fig. 8). The bacterium not not  
269 only invades the host cells, but also subverts trafficking of bacterium-containing  
270 vacuoles through the endosomal pathway and translocation to an specialized  
271 aggressively replication niche. Moreover, we showed that a T3SS effector EseJ is  
272 essential for the intracellular replication by disrupting endosomal maturation and  
273 lysosome fusion, which is critical for virulence of *E. piscicida in vivo*.  
274

## 275 **Methods**

### 276 **Ethics Statemen**

277 The animal trials in this study were performed according to the Chinese Regulations of  
278 Laboratory Animals—The Guidelines for the Care of Laboratory Animals (Ministry of  
279 Science and Technology of People's Republic of China) and Laboratory Animal-  
280 Requirements of Environment and Housing Facilities (GB 14925-2010, National  
281 Laboratory Animal Standardization Technical Committee). The license number  
282 associated with their research protocol was 20170912-08, which was approved by The  
283 Laboratory Animal Ethical Committee of East China University of Science and  
284 Technology. All surgery was performed under carbon dioxide anesthesia, and all efforts  
285 were made to minimize suffering.

### 286 **Bacterial strains and cell culture**

287 Wild type *Edwardsiella piscicida* EIB202, the T3SS mutant and the T6SS mutant were  
288 constructed and grown as described previously [22]. For constitutive expression of GFP  
289 or mCherry, *E. piscicida* strains were electroporated with pUTt0456GFP or  
290 pUTt0456mCherry, respectively. HeLa cells (ATCC number CCL-2), Caco-2 cells  
291 (ATCC number HTB-37) and ZF4 cells (ATCC number CRL-2050) were all from  
292 China Center for Type Culture Collection. HeLa cells and Caco-2 cells were cultured  
293 at 37°C under 5% CO<sub>2</sub> atmosphere in Dulbecco's minimal Eagle's medium (DMEM)  
294 supplemented with 10% fetal bovine serum (FBS), called growth medium (GM). ZF4  
295 cells were cultured at 30°C under 5% CO<sub>2</sub> atmosphere in GM.

### 296 **Construction of mutant strains**

297 In-frame deletion mutants of the effector genes including *eseG*, *eseJ*, *eseH* and *eseK*  
298 were generated by the *sacB*-based allelic exchange as previously described. The  
299 fragments upstream and downstream of each effector gene were fused by overlap PCR.  
300 These fragments were then cloned into the *sacB* suicide vector pDMK and linearized  
301 with BglIII and SphI, and the resulting plasmids were transformed into *Escherichia coli*  
302 (*E. coli*) CC118  $\lambda$ pir. The correct plasmids were then transformed into *E. coli* SM10  
303  $\lambda$ pir and then conjugated into EIB202. The trans-conjugants with the plasmids  
304 integrated into the chromosome by homologous recombination were selected on tryptic  
305 soy agar (TSA) medium containing kanamycin (Km, 50 mg/ml) or colistin (Col, 12.5  
306 mg/ml). To complete the allelic exchange for in-frame deletions, double-crossover  
307 events were counter-selected on TSA plates containing 10% sucrose. All of the mutants  
308 were confirmed by PCR amplification of the respective DNA loci, and subsequent DNA  
309 sequencing of each PCR product.

### 310 **Infection protocol**

311 HeLa cells, Caco-2 cells or ZF4 cells were infected with *E. piscicida* strains at a  
312 multiplicity of infection (MOI) of 100. *E. piscicida* was grown overnight in tryptic soy  
313 broth (TSB) at 30°C with shaking, then diluted into fresh DMEM with standing at 30°C  
314 until OD<sub>600</sub> reached 0.8. Harvested bacteria in phosphate-buffer saline (PBS)  
315 suspensions were added to cells according to MOI. To synchronize infection, plates  
316 were then centrifuged at 600 g for 10 min. At 1 h after incubation, cells were washed  
317 three times with PBS and then incubated with growth medium containing 100  $\mu$ g/ml  
318 gentamicin for 1h to kill the extracellular bacteria, after which the gentamicin



319 concentration was decreased to 10 µg/ml for the remainder of the experiment.

### 320 **Gentamicin protection assay**

321 For enumeration of viable intracellular bacteria, bacteria were added to triplicate wells  
322 of HeLa cell monolayers for infection as described above. At each indicated time point,  
323 extracellular bacteria were killed with gentamicin. Monolayers were washed with PBS,  
324 and cells were lysed by incubation with PBS containing 1% Triton X-100 for 30 min at  
325 room temperature. The lysate was serially diluted in PBS and plated onto TSB agar  
326 plates. Plates were incubated at 30°C overnight for subsequent CFU enumeration.

### 327 **Labeling of subcellular compartments with dyes**

328 For the acidification studies, 75 nM LysoTracker Red DND-99 (Invitrogen) was added  
329 to the samples 30 min prior to cell fixation. For labeling of lysosomes with Texas Red  
330 dextran, HeLa cells were treated with 100 µg/ml of Texas Red dextran (Invitrogen) for  
331 12 h and chased overnight. For ER staining, cells were washed with HBSS and stained  
332 with 100 nM ER-tracker (green) for 30 min at indicated time point. For DQ Red BSA  
333 assay, after 8 h of infection or cells transfection, cells were incubated for 1 h in growth  
334 medium containing DQ Red BSA (0.25 mg/ml), washed with PBS, and incubated in  
335 growth medium for 4 h.

### 336 **Dextran 488 Loading and Rhodamine Dextran Pulse-chase**

337 HeLa cells were seeded on coverslips in 24-well tissue culture plates at  $2 \times 10^5$  cells/well  
338 then incubated in presence of dextran Alexa Fluor® 488 (0.1 mg/ml) for 8 h. Cells were  
339 then washed twice with PBS, incubated with growth medium and transfected with  
340 vector or EseJ-HA overnight. The following day cells were incubated for 30 min in the

341 presence of tetramethylrhodamine dextran (0.2 mg/ml), then washed twice with PBS,  
342 and the dye was chased for 2 h in regular growth medium.

### 343 **Immunofluorescence and confocal microscopy**

344 HeLa cells were seeded onto 24-well plates containing sterile coverslips at a density of  
345  $2 \times 10^5$  cells/ml. Following infection with *E. piscicida* strains and gentamicin incubation  
346 for the indicated time, cells were washed with phosphate-buffered saline (PBS) and  
347 then fixed in 4% (v/v) paraformaldehyde for 10 min at room temperature. After washing  
348 with PBS, cells were blocked and permeabilized in PBS containing 10% (v/v) normal  
349 goat serum (NGS) and 1% (v/v) bovine serum albumin (BSA) and 0.1% (w/v) saponin  
350 (SS-PBS) for 10 min at room temperature. Primary antibody of LAMP-1(clone H4A3)  
351 and secondary antibodies were diluted in SS-PBS at appropriate dilutions and incubated  
352 serially for 1 h at room temperature. Between antibody incubations, coverslips were  
353 washed three times with PBS containing 0.05% (w/v) saponin for 5 min each time.  
354 Nuclei and actin cytoskeleton were stained with Hoechst (Sigma) and rhodamine-  
355 phalloidin (Molecular Probes), respectively. Fixed samples were viewed on a Nikon  
356 A1R confocal microscope. Images were analyzed using ImageJ (NIH).

### 357 **Mice infection**

358 C57BL/6J wild-type from the Jackson Lab (6–8 weeks old) were bred under specific  
359 pathogen-free conditions. For oral infections, water and food were withdrawn 4 h  
360 before per os (p.o.) treatment with 20 mg/100  $\mu$ L streptomycin per mouse. Afterward,  
361 animals were supplied with water and food ad libitum. At 20 h after streptomycin  
362 treatment, water and food were withdrawn again for 4 h before the mice were orally

363 infected with  $2.5 \times 10^7$  CFU/g of EIB202 or  $\Delta eseJ$  suspension in 200  $\mu$ L PBS, or treated  
364 with sterile PBS (control). Thereafter, drinking water ad libitum was offered  
365 immediately and food 2 h post-infection. At the indicated time points, mice were  
366 sacrificed and the tissue samples from the intestinal tracts, kidneys, spleens, and livers  
367 were removed for analyses.

### 368 **Zebrafish infection**

369 Three-month old adult zebrafish (about 0.4 g) were randomly divided into groups (n=35)  
370 and infected via intramuscular injection with bacterial sample (50 cfu/fish) or PBS as a  
371 control. Fish mortality was recorded in each infection group over a period of 4 days.  
372 For immersion infection of zebrafish larvae, larvae at 5 days post-fertilization were  
373 randomly divided and immersed in PBS or PBS containing  $10^5$  cfu/ml *E. piscicida* wild-  
374 type or  $\Delta eseJ$  for 2 h. Subsequently, they were transferred to 10-cm dishes, with  
375 approximately 50 larvae in 15 ml of E3 medium per dish, and incubated at 28 °C. The  
376 bacterial colonization of every 5 fishes were then analyzed at different time points. All  
377 animal experiments were approved by the Institutional Animal Care and Use  
378 Committee of East China University of Science and Technology.

### 379 **Statistical analysis**

380 All experiments were performed three times (as indicated in the figure legends).  
381 Statistical analyses were performed by using the student's t-test in the SPSS software  
382 (Version 11.5, SPSS Inc.). In all cases, the significance level was defined as \*  $p \leq 0.05$ ,  
383 \*\*  $p \leq 0.01$  and \*\*\*  $p \leq 0.001$ .

384

## 385 References

- 386 1. Isberg RR, O'Connor TJ, Heidtman M. (2009) The *Legionella pneumophila*  
387 replication vacuole: making a cosy niche inside host cells. *Nature Reviews*  
388 *Microbiology* 7:13–24.
- 389 2. Pizarro-Cerdá J, Méresse S, Parton RG, van der Goot G, Sola-Landa A, Lopez-  
390 Goñi I, et al. (1998) *Brucella abortus* Transits through the Autophagic Pathway  
391 and Replicates in the Endoplasmic Reticulum of Nonprofessional Phagocytes.  
392 *Infect Immun* 66:5711–24.
- 393 3. Liss V, Hensel M. (2015) Take the tube: remodelling of the endosomal system by  
394 intracellular *Salmonella enterica*. *Cellular Microbiology* 17:639–47.
- 395 4. Ray K, Marteyn B, Sansonetti PJ, Tang CM. (2009) Life on the inside: the  
396 intracellular lifestyle of cytosolic bacteria. *Nat Rev Microbiol* 7:333–40.
- 397 5. Rathman M, Sjaastad MD, Falkow S. (1996) Acidification of phagosomes  
398 containing *Salmonella typhimurium* in murine macrophages. *Infect Immun*  
399 64:2765–73.
- 400 6. Heinzen RA, Scidmore MA, Rockey DD, Hackstadt T. (1996) Differential  
401 interaction with endocytic and exocytic pathways distinguish parasitophorous  
402 vacuoles of *Coxiella burnetii* and *Chlamydia trachomatis*. *Infect Immun* 64:796–  
403 809.
- 404 7. Clemens DL, Horwitz MA. (1996) The *Mycobacterium tuberculosis* phagosome  
405 interacts with early endosomes and is accessible to exogenously administered  
406 transferrin. *Journal of Experimental Medicine* 184:1349–55.
- 407 8. Wang B, Yu T, Dong X, Zhang Z, Song L, Xu Y, et al. (2013) *Edwardsiella tarda*  
408 invasion of fish cell lines and the activation of divergent cell death pathways.  
409 *Veterinary Microbiology* 163:282–9.
- 410 9. Okuda J, Arikawa Y, Takeuchi Y, Mahmoud MM, Suzaki E, Kataoka K. (2006)  
411 Intracellular replication of *Edwardsiella tarda* in murine macrophage is dependent  
412 on the type III secretion system and induces an up-regulation of anti-apoptotic NF-  
413  $\kappa$ B target genes protecting the macrophage from staurosporine-induced apoptosis.  
414 *Microbial Pathogenesis* 41:226–40.
- 415 10. Coulthurst SJ. (2013) The Type VI secretion system – a widespread and versatile  
416 cell targeting system. *Research in Microbiology* 164:640–54.
- 417 11. Galán JE, Lara-Tejero M, Marlovits TC, Wagner S. (2014) Bacterial type III  
418 secretion systems: specialized nanomachines for protein delivery into target cells.  
419 *Annu Rev Microbiol* 68:415–38.
- 420 12. Kagan JC, Stein M-P, Pypaert M, Roy CR. (2004) *Legionella* subvert the  
421 functions of Rab1 and Sec22b to create a replicative organelle. *J Exp Med*  
422 199:1201–11.
- 423 13. McGourty K, Thurston TL, Matthews SA, Pinaud L, Mota LJ, Holden DW. (2012)  
424 *Salmonella* inhibits retrograde trafficking of mannose-6-phosphate receptors and  
425 lysosome function. *Science* 338:963–7.
- 426 14. D'Costa VM, Braun V, Landekic M, Shi R, Proteau A, McDonald L. (2015)  
427 *Salmonella* Disrupts Host Endocytic Trafficking by SopD2-Mediated Inhibition

- 428 of Rab7. *Cell Reports* 12:1508–18.
- 429 15. Leung KY, Siame BA, Tenkink BJ, Noort RJ, Mok YK. (2012) *Edwardsiella*  
430 *tarda* – Virulence mechanisms of an emerging gastroenteritis pathogen. *Microbes*  
431 *and Infection* 14:26–34.
- 432 16. Xie HX, Yu HB, Zheng J, Nie P, Foster LJ, Mok YK. (2010) EseG, an effector of  
433 the type III secretion system of *Edwardsiella tarda*, triggers microtubule  
434 destabilization. *Infect Immun* 78:5011–21.
- 435 17. Xie HX, Lu JF, Zhou Y, Yi J, Yu X-J, Leung KY. (2015) Identification and  
436 functional characterization of the novel *Edwardsiella tarda* effector EseJ. *Infect*  
437 *Immun* 83:1650–60.
- 438 18. Hou M, Chen R, Yang D, Núñez G, Wang Z, Wang Q. (2017) Identification and  
439 functional characterization of EseH, a new effector of the type III secretion system  
440 of *Edwardsiella piscicida*. *Cellular Microbiology* 19:e12638.
- 441 19. Cao H, Yang C, Quan S, Hu T, Zhang L, Zhang Y, et al. (2018) Novel T3SS  
442 effector EseK in *Edwardsiella piscicida* is chaperoned by EscH and EscS to  
443 express virulence. *Cell Microbiol* 20.
- 444 20. Chen H, Yang D, Han F, Tan J, Zhang L, Xiao J, et al. (2017) The bacterial T6SS  
445 effector EvpP prevents NLRP3 inflammasome activation by inhibiting the Ca<sup>2+</sup>-  
446 dependent MAPK-Jnk pathway. *Cell Host Microbe* 21:47–58.
- 447 21. Fang S, Zhang L, Lou Y, Yang D, Wang Q, Zhang Y, et al. (2016) Intracellular  
448 translocation and localization of *Edwardsiella tarda* type III secretion system  
449 effector EseG in host cells. *Microbial Pathogenesis* 97:166–71.
- 450 22. Yang W, Wang L, Zhang L, Qu J, Wang Q, Zhang Y. (2015) An invasive and low  
451 virulent *Edwardsiella tarda* *esrB* mutant promising as live attenuated vaccine in  
452 aquaculture. *Appl Microbiol Biotechnol* 99:1765–77.
- 453 23. Zhang L, Ni C, Xu W, Dai T, Yang D, Wang Q, et al. (2016) Intramacrophage  
454 infection reinforces the virulence of *Edwardsiella tarda*. *J Bacteriol* 198:1534–42.
- 455 24. Paz I, Sachse M, Dupont N, Mounier J, Cederfur C, Enninga J, et al. (2010)  
456 Galectin-3, a marker for vacuole lysis by invasive pathogens. *Cell Microbiol*  
457 12:530–44.
- 458 25. Eissenberg LG, Goldman WE. (1988) Fusion of lysosomes with phagosomes  
459 containing *Histoplasma capsulatum*: use of fluoresceinated dextran. *Adv Exp*  
460 *Med Biol* 239:53–61.
- 461 26. Celli J, de Chastellier C, Franchini DM, Pizarro-Cerda J, Moreno E, Gorvel JP.  
462 (2003) *Brucella* evades macrophage killing via VirB-dependent sustained  
463 interactions with the endoplasmic reticulum. *J Exp Med* 198:545–56.
- 464 27. Okuda J, Takeuchi Y, Nakai T. (2014) Type III secretion system genes of  
465 *Edwardsiella tarda* associated with intracellular replication and virulence in  
466 zebrafish. *Dis Aquat Org* 111:31–9.
- 467 28. Vergne I, Chua J, Lee H-H, Lucas M, Belisle J, Deretic V. (2005) Mechanism of  
468 phagolysosome biogenesis block by viable *Mycobacterium tuberculosis*. *Proc*  
469 *Natl Acad Sci U S A* 102:4033–8.
- 470 29. Ku B, Lee KH, Park WS, Yang CS, Ge J, Lee SG. (2012) VipD of *Legionella*  
471 *pneumophila* targets activated Rab5 and Rab22 to interfere with endosomal

472 trafficking in macrophages. PLoS Pathog 8:e1003082.  
473 30. Yu X-J, Liu M, Holden DW. (2016) *Salmonella* effectors SseF and SseG interact  
474 with mammalian protein ACBD3 (GCP60) to anchor *Salmonella*-containing  
475 vacuoles at the Golgi network. mBio 7.

476

477

478

## 479 **Supporting Figures Legend**

480 **S1 Fig.** *E. piscicida* resides and replicates in special pathogen-contained vacuoles. (A)  
481 Representative electron micrographs of *E. piscicida*-infected HeLa cells. The vacuole  
482 membranes are indicated by the white arrows. Star means *E. piscicida*. Bar = 5  $\mu$ m. (B)  
483 Quantifications of galectin3 specks in HeLa cells infected with wild type EIB202 for  
484 the indicated times. Over 30 cells were analyzed for each condition. Values are means  
485  $\pm$  SD ( $n= 3$ ).

486 **S2 Fig.** *E. piscicida* utilizes effector EseJ to prevent lysosome maturation and fusion.  
487 (A) Representative confocal micrograph of Rab7-expressed HeLa cells after infection  
488 with *E. piscicida* EIB202 or  $\Delta$ *eseJ* at an MOI of 100 for 4 h. (B) Representative confocal  
489 micrograph of ECVs colocalization with lamp-1 after infection with *E. piscicida*  
490 EIB202 or  $\Delta$ *eseJ* at the indicated gentamicin incubation times. Scale bars, 20  $\mu$ m. (C)  
491 Representative confocal micrograph of HeLa cells infected with GFP-labeled *E.*  
492 *piscicida* EIB202,  $\Delta$ T3SS or  $\Delta$ *eseJ* for 1 h and incubated with 100  $\mu$ g/ml gentamicin  
493 for 8 h. Cells were stained with DQ Red BSA (0.25 mg/ml) for 1 h. DNA was stained  
494 using DAPI (blue).

495

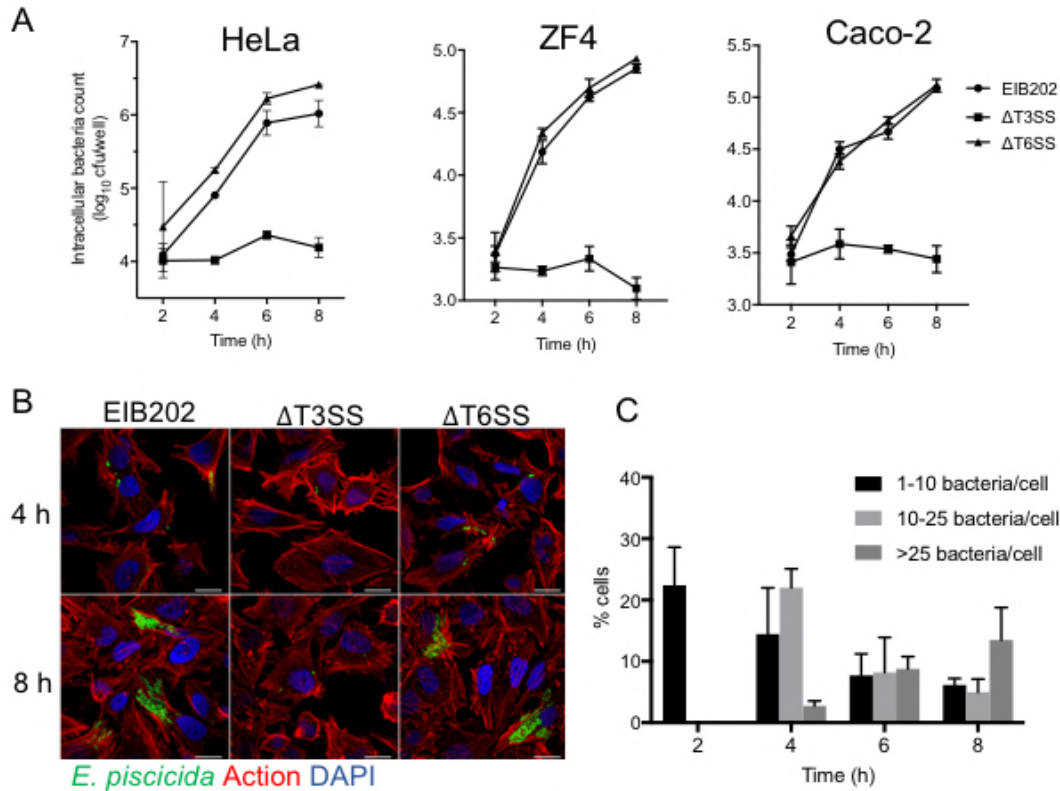

496

497 **Fig 1. *E. piscicida* replicates in non-phagocytotic cells dependent on T3SS but not**  
498 **T6SS.** (A) HeLa cells, ZF4 and Caco-2 cells were infected with *E. piscicida* EIB202,  
499 ΔT3SS or ΔT6SS at an MOI of 100 for 1 h, followed by treatment with 100 μg/ml  
500 gentamicin for 1 h to kill extracellular bacteria. Intracellular bacteria at different time  
501 point were quantified by lysis, serial dilution and viable counting on TSB agar plates.  
502 (B) Confocal microscopy of HeLa cells infected with GFP-labeled *E. piscicida* EIB202,  
503 ΔT3SS or ΔT6SS at 4 and 8 h. Data are representative of at least three experiments, and  
504 representative microscopic images are shown. Filamentous actin was stained by  
505 rhodamine-phalloidin (red), and DNA was stained by DAPI (blue). Scale bars, 20 μm.  
506 (C) Percentage of infected cells containing one to ten, ten to twenty-five or more than  
507 twenty-five intracellular wild-type *E. piscicida* over time.  
508



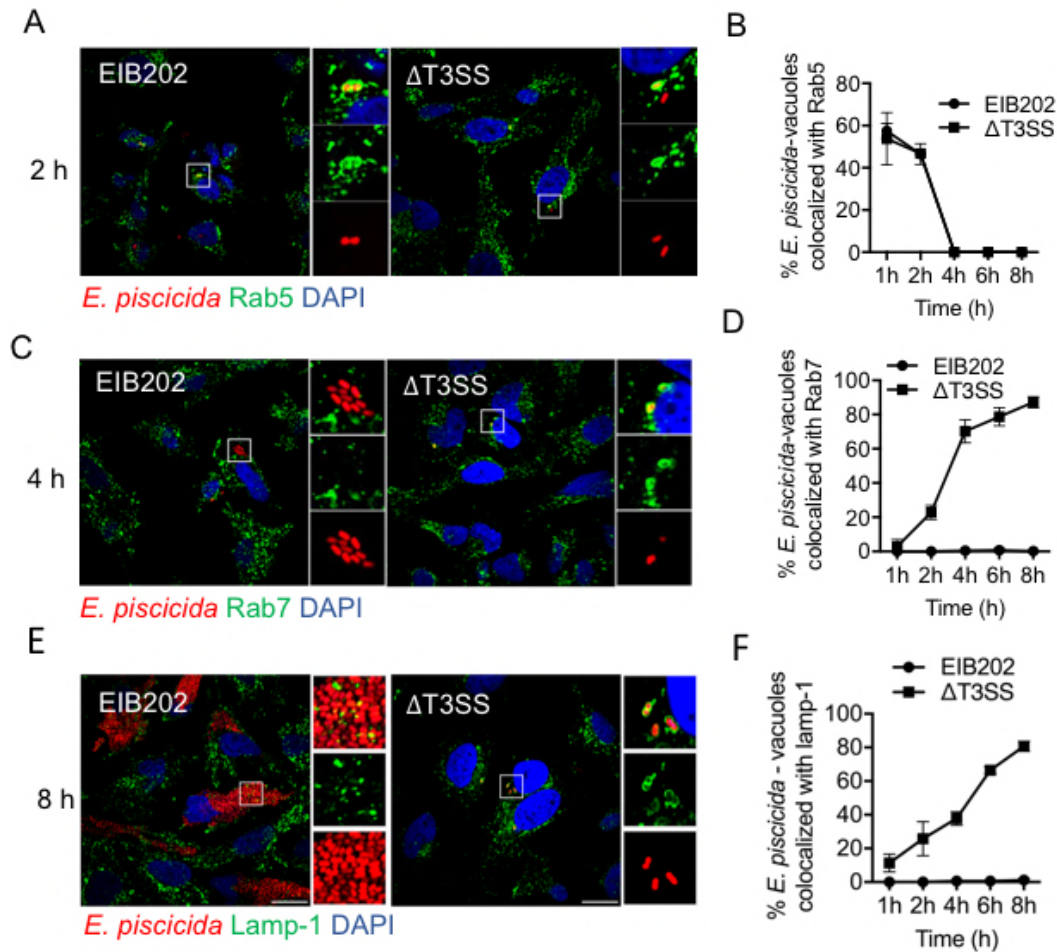

509

510 **Fig 2. *E. piscicida*-contained vacuoles evades maturation into late endosomes.** (A,  
511 C and E) Representative confocal micrographs of HeLa cells infected with RFP-  
512 expressing *E. piscicida* wild-type EIB202 or  $\Delta$ T3SS and incubated with gentamicin for  
513 the times indicated on the sides of the panels. Cells were pre-transfected with GFP-  
514 Rab5(A [Green]), GFP-Rab7 (C [Green]) or immunostained for lamp-1 (E [Green]).  
515 DNA was stained using DAPI (blue). White boxes indicate the magnified area to the  
516 right of each panel. Scale bars, 20  $\mu$ m. (B, D and F) Quantifications of ECVs  
517 colocalization with Rab5 (B), Rab7 (D) and lamp-1 (F) for the indicated times. Over 30  
518 cells were analyzed for each condition. Values are means  $\pm$  SD (n= 3).



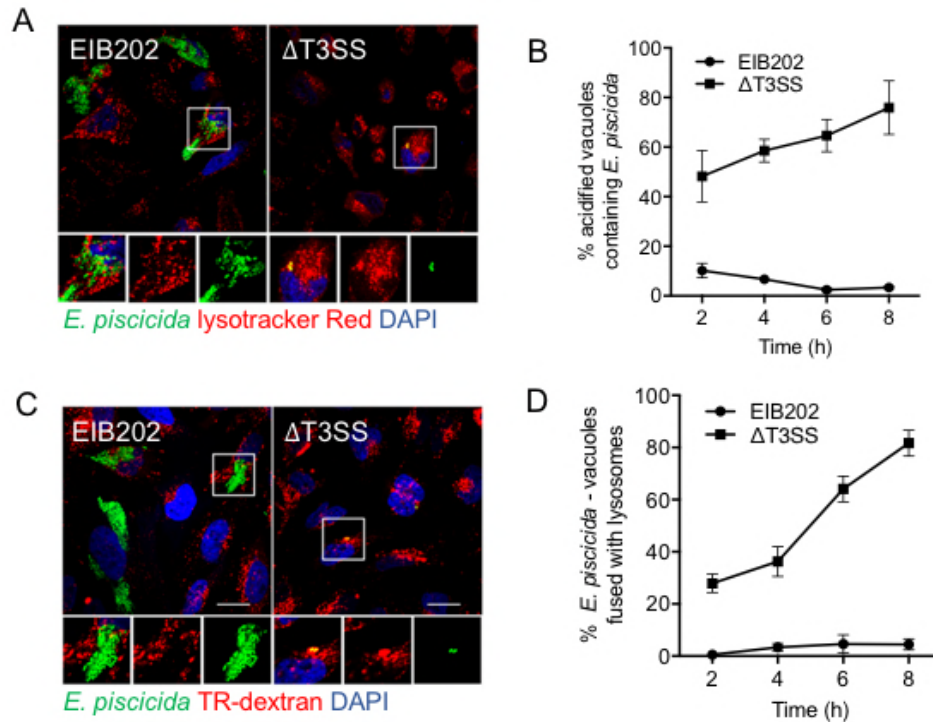

519

520 **Fig 3. *E. piscicida*-contained vacuoles evades fusion with lysosomes by T3SS.** (A)  
521 Representative confocal micrograph of HeLa cells infected with GFP-labeled *E.*  
522 *piscicida* EIB202 or ΔT3SS for 1 h and incubated with 100 μg/ml gentamicin for 8 h.  
523 During the last 30 min of antibiotic treatment, samples were added with 75 nM  
524 Lysotracker Red DND-99 (red). DNA was stained using DAPI (blue). White boxes  
525 indicate the magnified area to the below of each panel. Scale bars, 20 μm. (B)  
526 Quantification of acidified vacuoles containing *E. piscicida* EIB202 or ΔT3SS at the  
527 indicated gentamicin incubation times. Values are means±SD from over 30 cells (n=  
528 3). (C) Representative confocal micrograph of HeLa cells preloaded with 1 mg/ml  
529 Texas Red dextran (red) for 6 h and chased overnight, after which cells were infected  
530 with GFP-labeled *E. piscicida* EIB202 or ΔT3SS for 1 h and incubated with gentamicin  
531 for 8 h. Scale bars, 20 μm. (D) Quantification of *E. piscicida*-contained vacuoles  
532 colocalized with Dextran at the indicated gentamicin incubation times. Values are  
533 means±SD from over 30 cells (n=3).

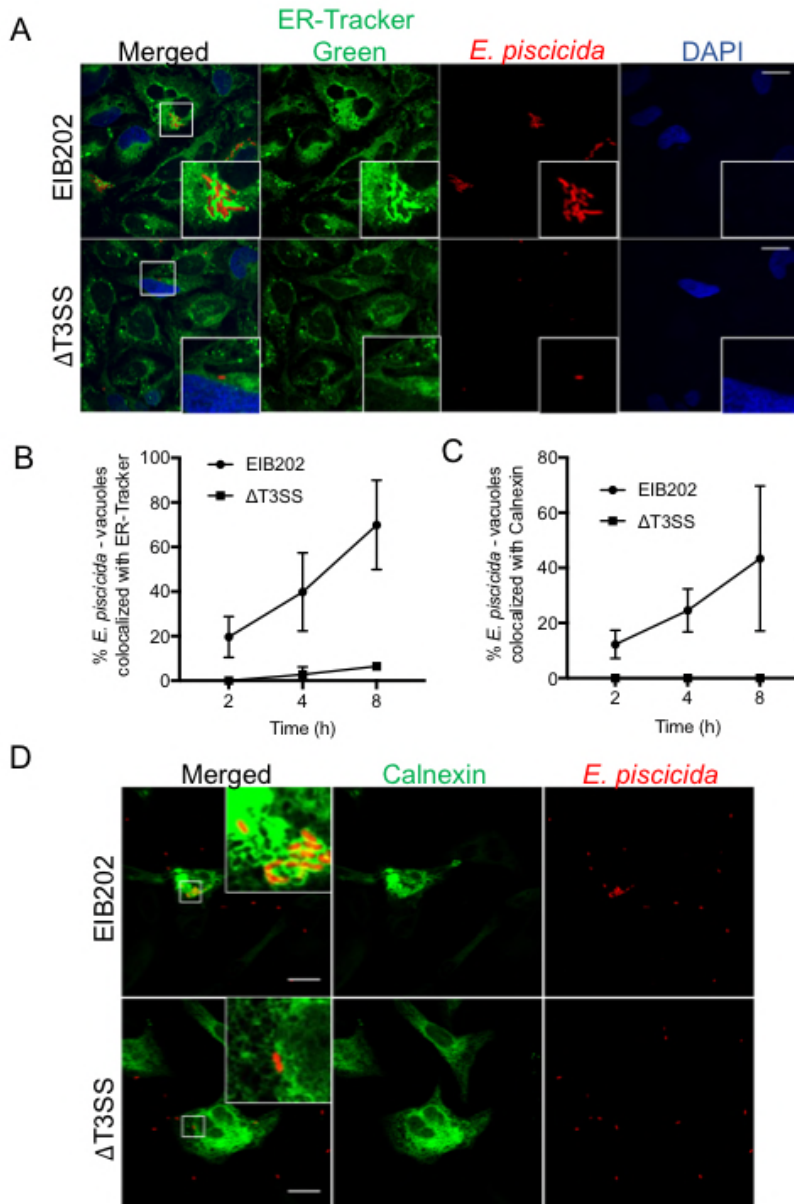

534

535 **Fig 4. *E. piscicida* resides and replicates in ER-characterized vacuoles.** (A)  
536 Representative confocal micrograph of HeLa cells infected with RFP-labeled *E.*  
537 *piscicida* EIB202 or ΔT3SS for 1 h and incubated with 100 μg/ml gentamicin for 4 h.  
538 During the last 30 min of antibiotic treatment, cells were washed with HBSS and stained  
539 with 100 nM ER-tracker (green). DNA was stained using DAPI (blue). Insets are  
540 enlarged from the indicated area. Scale bars, 20 μm. (B) and (C) Quantifications of *E.*  
541 *piscicida*-contained vacuoles colocalization with ER-tracker (B) or Calnexin (C) at the  
542 indicated gentamicin incubation times. Values are means±SD from over 30 cells ( $n=3$ ).  
543 (D) Representative confocal micrograph of HeLa cells infected with RFP-labeled *E.*  
544 *piscicida* EIB202 or ΔT3SS for 1 h and incubated with 100 μg/ml gentamicin for 4 h.  
545 Cells were immunostained with Calnexin (GFP). DNA was stained using DAPI (blue).  
546 Insets are enlarged from the indicated area. Scale bars, 20 μm.

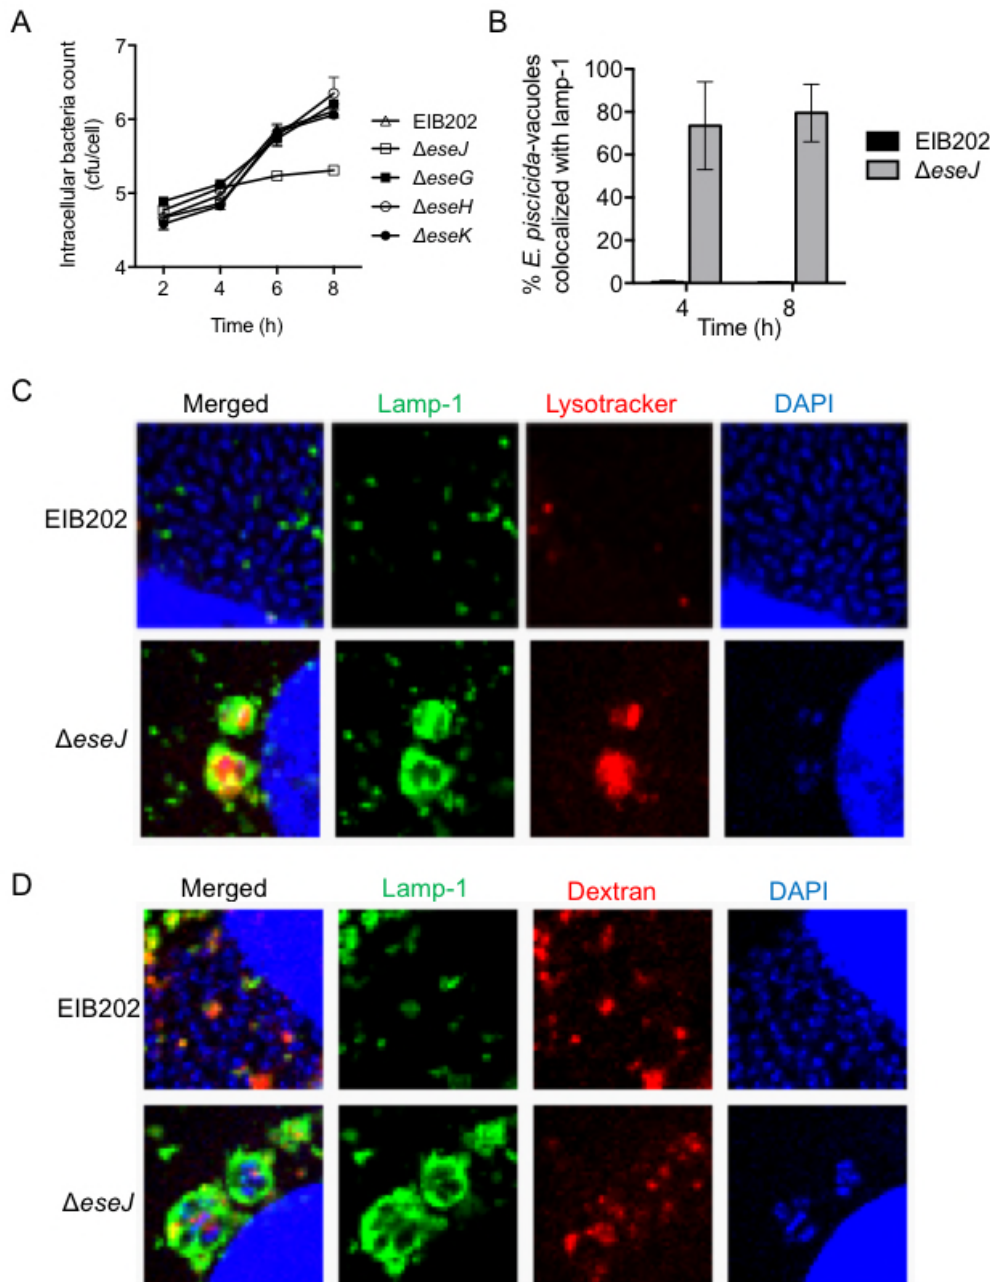

547

548 **Fig 5. The T3SS effector EseJ is critical for intracellular replication of *E. piscicida***  
549 **in HeLa cells.** (A) HeLa cells were infected with *E. piscicida* EIB202,  $\Delta$ eseJ,  $\Delta$ eseG,  
550  $\Delta$ eseH or  $\Delta$ eseK at an MOI of 100 for 1 h, followed by treatment with 100  $\mu$ g/ml  
551 gentamicin for 1 h to kill extracellular bacteria. Intracellular bacteria at different time  
552 point were quantified by lysis, serial dilution and viable counting on TSB agar plates.  
553 (B) Quantifications of ECVs colocalization with lamp-1 at the indicated gentamicin  
554 incubation times. Values are means $\pm$ SD from over 30 cells (n=3). (C-D) Representative  
555 confocal micrograph of HeLa cells infected with GFP-labeled *E. piscicida* EIB202 or  
556  $\Delta$ eseJ for 1 h and incubated with 100  $\mu$ g/ml gentamicin for 8 h. Cells were stained with  
557 75 nM Lysotracker Red DND-99 (C, red) or preloaded with 1 mg/ml Texas Red dextran

558 (red) for 6 h and chased overnight. DNA was stained using DAPI (blue) and late  
559 endosomes/lysosome were immunostained with lamp-1. Scale bars, 20  $\mu\text{m}$ .

560

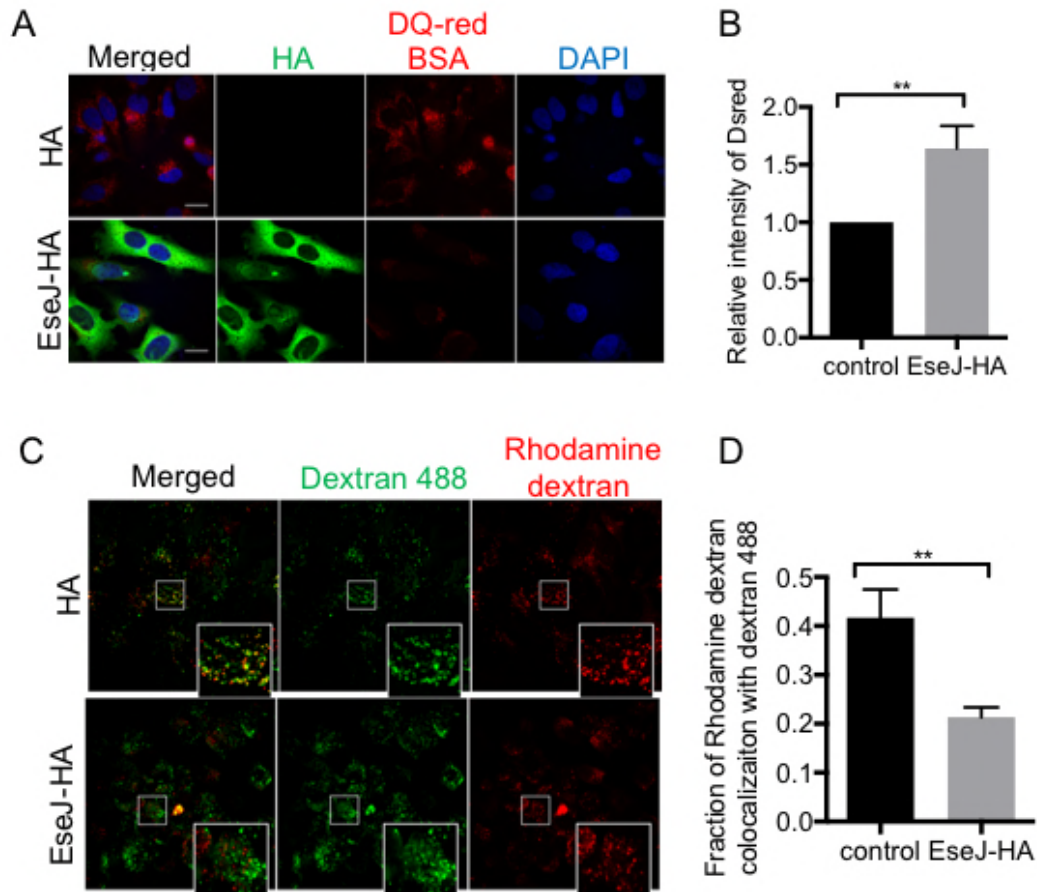

561

562 **Fig 6. The T3SS effector EseJ is necessary and sufficient to block endocytic**  
563 **trafficking to lysosomes.** (A) HeLa cells which stably expressed HA tagged EseJ or  
564 HA tag only were incubated with DQ-Red BSA (red) for 1 hr. Images were acquired  
565 after an additional 4 hr chase. (B) Quantification of DQ-Red BSA signal for (A), \*\*  
566  $p < 0.01$ . (C) HeLa cells which preloaded with dextran 488 for 8 hr, transfected with HA  
567 or EseJ-HA (green), and then pulsed with rhodamine dextran for 30 min. Imaging was  
568 performed after 2 hr of chase. (D) Quantification of colocalization signal between two  
569 dextran derivatives for (C), \*\*  $p < 0.01$ .

570

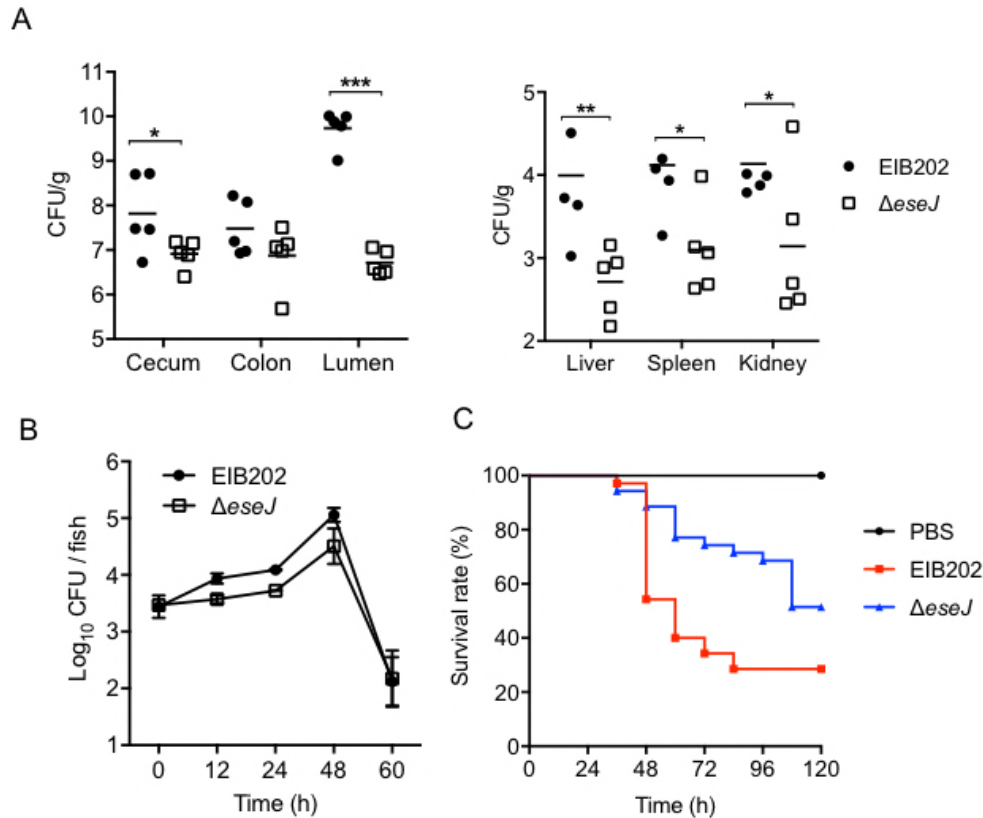

571

572 **Fig 7. Critical role of EseJ in promoting virulence and colonization of *E. piscicida***  
573 ***in vivo*.** (A) Bacteria burden in the colon, cecum, lumen, liver, spleen, and kidney of  
574 mice was measured after orally-infection with EIB202 or  $\Delta$ eseJ ( $2.5 \times 10^7$  cfu/g) at 48  
575 hpi. \*  $p < 0.05$ , \*\*  $p < 0.01$ , \*\*\*  $p < 0.001$ . (B) Bacteria burden in zebrafish larvae was  
576 measured at indicated time points after infection by immersion with  $1 \times 10^5$  cfu/ml  
577 EIB202 or  $\Delta$ eseJ. N = 5 fish per group per time point. Data are representative of at least  
578 three experiments. (C) Survival of zebrafish infected with EIB202 or  $\Delta$ eseJ (50 cfu/fish).  
579 N = 35 fish per group. Data shown are from at least three representative experiments.

580



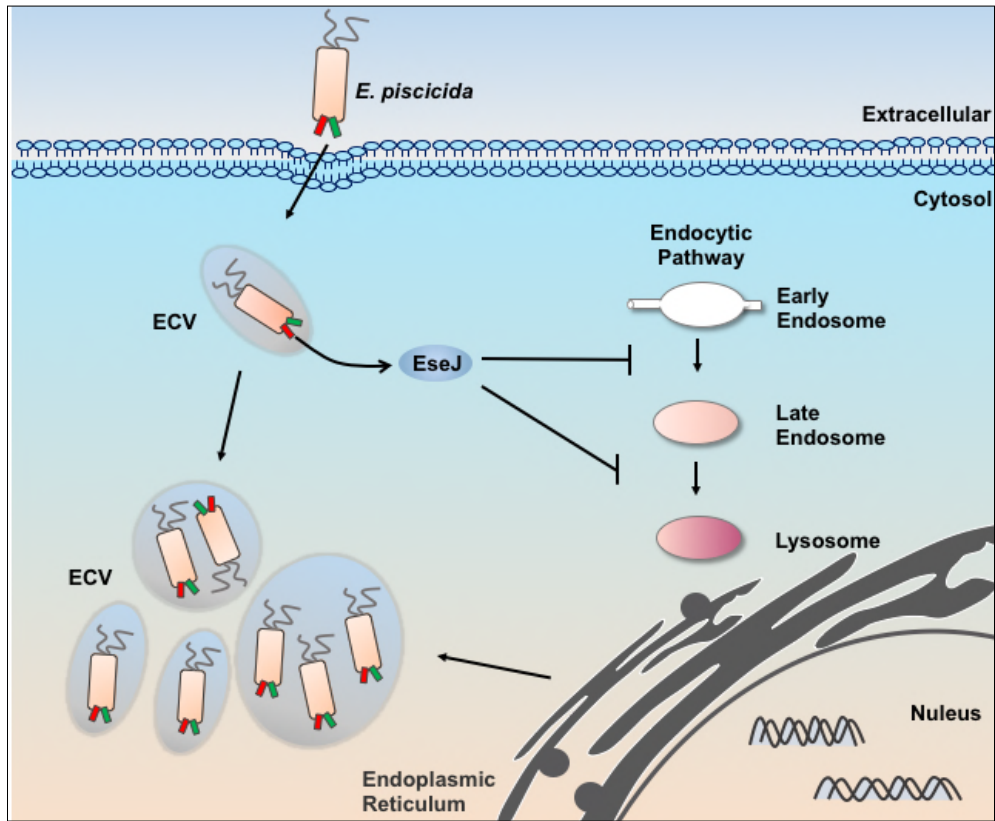

581

582 **Fig 8. Proposed model for *E. piscicida* intracellular life cycle in non-phagocytic**  
583 **cells.** After entry, intracellular wild type *E. piscicida* resides within vacuoles (ECVs)  
584 that interact with early endosomes. At intermediate stages of infection, an T3SS effector  
585 EseJ was secreted into cell cytosol to globally disrupt endocytic trafficking to  
586 lysosomes, which helps to protect ECVs from lysosome fusion. Therefore, these early  
587 ECVs bypass the regular lysosomal routing but contact with the ER to facilitate its  
588 later robust replication.

589

590

591
